# Supplementary material
Source: PubMed Central journal article supplement (PMC2954530)
Supplement: ja105068b_si_001.pdf [file ja105068b_si_001.pdf]

## Supporting Information

# Structural Basis for Cyclic Py-Im Polyamide Allosteric Inhibition of Nuclear Receptor Binding

*David M. Chenoweth and Peter B. Dervan\**

Division of Chemistry and Chemical Engineering, California Institute of Technology, Pasadena, CA 91125

### SUPPORTING INFORMATION FIGURES:

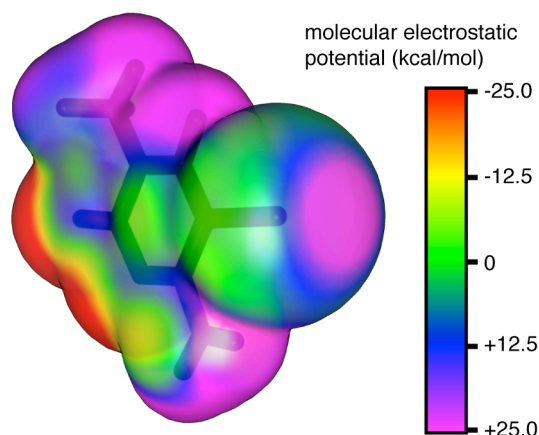

**Figure S1.** Molecular electrostatic potential map for 5-iodocytosine (C<sub>1</sub>) showing the electropositive crown of the highly polarizable iodine atom involved in halogen bonding interactions. The electrostatic potential surface was generated by mapping the electrostatic potential onto the molecular electron density surface (0.002 electron/Å<sup>3</sup>). The molecular electrostatic potential energy values range from -25 kcal/mol for values of negative potential (red) to +25 kcal/mol for values of positive potential (purple).

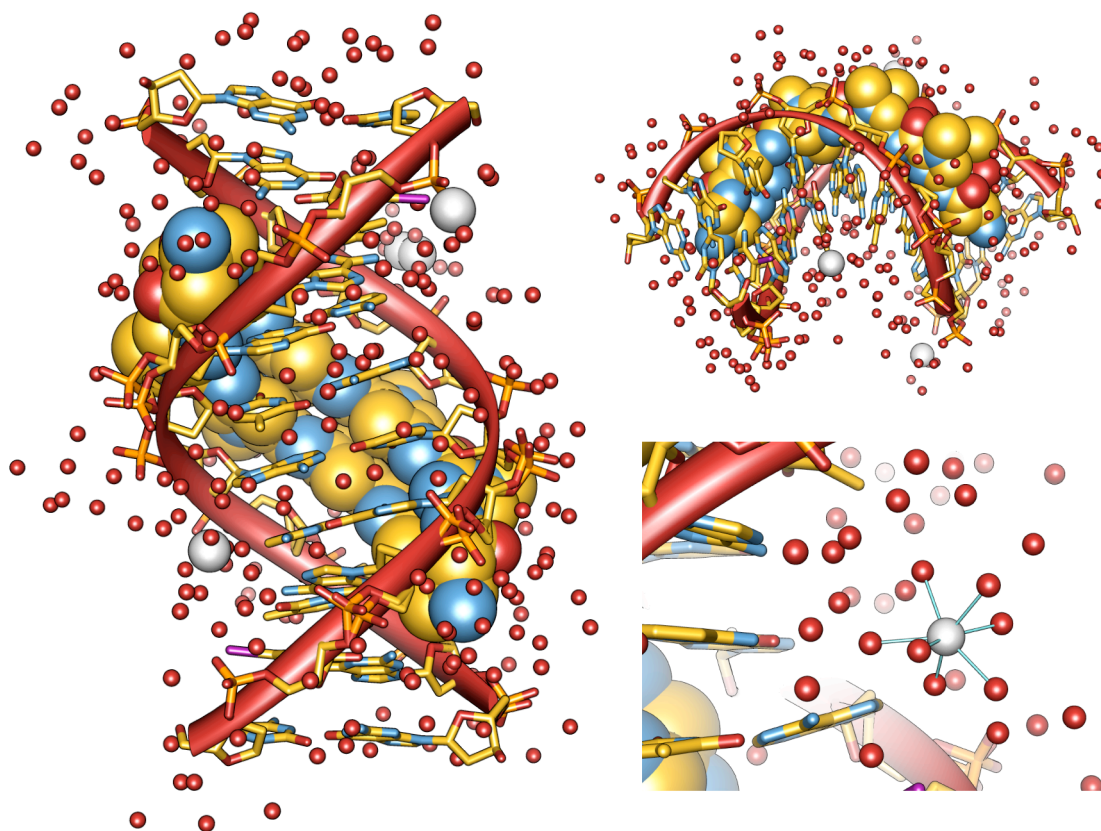

*Figure S2.* Hydration of the polyamide-DNA complex.

**Local base-pair step parameters**

| Parameter* | CC/GG | CA/TG | AG/CT | GT/AC | TA/TA | AC/GT | CT/AG | TG/CA | GG/CC |
|------------|-------|-------|-------|-------|-------|-------|-------|-------|-------|
| Shift, Å   |       |       |       |       |       |       |       |       |       |
| DNA        | -0.58 | 0.23  | 0.58  | -0.73 | 0.00  | 0.73  | -0.58 | -0.23 | 0.58  |
| PA/DNA     | -0.07 | 0.45  | -1.72 | -0.74 | -0.04 | 0.78  | 1.75  | -0.80 | 0.34  |
| Slide, Å   |       |       |       |       |       |       |       |       |       |
| DNA        | 0.78  | 2.87  | 0.80  | 0.29  | -0.10 | 0.29  | 0.80  | 2.87  | 0.78  |
| PA/DNA     | -0.12 | 0.86  | 0.26  | -0.15 | 0.90  | -0.21 | 0.28  | 1.29  | 0.13  |
| Rise, Å    |       |       |       |       |       |       |       |       |       |
| DNA        | 3.28  | 3.29  | 3.10  | 3.29  | 3.66  | 3.29  | 3.10  | 3.29  | 3.28  |
| PA/DNA     | 3.28  | 3.16  | 3.39  | 3.20  | 3.28  | 3.24  | 3.33  | 3.06  | 3.19  |
| Tilt, °    |       |       |       |       |       |       |       |       |       |
| DNA        | 3.32  | -1.37 | -3.91 | 2.23  | 0.00  | -2.22 | 3.90  | 1.37  | -3.33 |
| PA/DNA     | 5.81  | 0.74  | -8.44 | 0.18  | -0.16 | 0.40  | 7.94  | 0.64  | -5.68 |
| Roll, °    |       |       |       |       |       |       |       |       |       |
| DNA        | 9.03  | -7.95 | 9.87  | -0.74 | 3.26  | -0.74 | 9.89  | -7.96 | 9.03  |
| PA/DNA     | 7.70  | 8.79  | 11.19 | 2.85  | 7.23  | 2.47  | 10.59 | 9.57  | 3.58  |
| Twist, °   |       |       |       |       |       |       |       |       |       |
| DNA        | 28.26 | 50.50 | 21.04 | 35.80 | 48.48 | 35.80 | 21.04 | 50.49 | 28.26 |
| PA/DNA     | 33.68 | 30.23 | 35.16 | 32.13 | 35.93 | 32.04 | 35.32 | 29.68 | 32.64 |

\*Relationship between the bases composing the base pair.

\*DNA corresponds to 0.73 Å structure of duplex DNA solved by Rees and coworkers (PDB 1D8G, 5'-CCAGTACTGG-3').

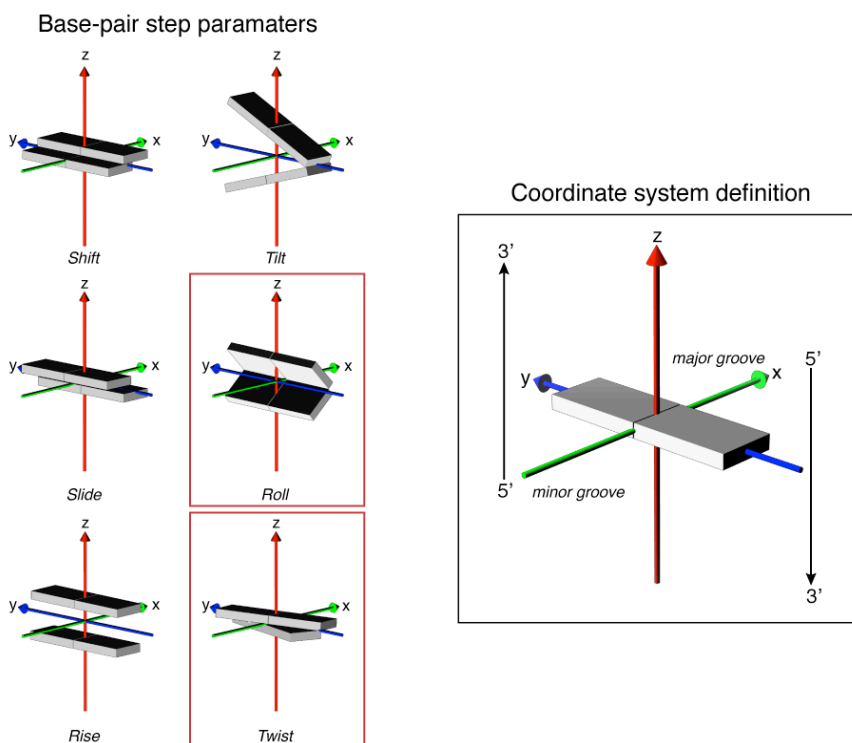

**Figure S3.** Local base-pair step parameters for DNA in the absence and presence of polyamide.

**Local base-pair parameters and sugar pucker**

| Parameter*   | C•G                  | C•G                 | A•T                  | G•C                 | T•A                  | A•T                  | C•G                 | T•A                  | G•C                  | G•C                 |
|--------------|----------------------|---------------------|----------------------|---------------------|----------------------|----------------------|---------------------|----------------------|----------------------|---------------------|
| Shear, Å     |                      |                     |                      |                     |                      |                      |                     |                      |                      |                     |
| DNA          | 0.15                 | 0.32                | 0.02                 | -0.19               | -0.09                | 0.09                 | 0.19                | -0.02                | -0.32                | -0.15               |
| PA/DNA       | 0.15                 | 0.19                | 0.13                 | -0.12               | -0.13                | 0.13                 | 0.12                | -0.10                | -0.16                | -0.16               |
| Stretch, Å   |                      |                     |                      |                     |                      |                      |                     |                      |                      |                     |
| DNA          | -0.15                | -0.16               | -0.11                | -0.07               | -0.03                | -0.03                | -0.07               | -0.11                | -0.16                | -0.15               |
| PA/DNA       | -0.14                | -0.10               | -0.11                | -0.07               | -0.10                | -0.09                | -0.10               | -0.13                | -0.04                | -0.10               |
| Stagger, Å   |                      |                     |                      |                     |                      |                      |                     |                      |                      |                     |
| DNA          | 0.09                 | 0.12                | 0.08                 | 0.25                | 0.00                 | 0.00                 | 0.25                | 0.08                 | 0.12                 | 0.09                |
| PA/DNA       | 0.27                 | -0.02               | -0.10                | 0.09                | -0.02                | 0.04                 | 0.09                | -0.14                | 0.07                 | 0.61                |
| Buckle, °    |                      |                     |                      |                     |                      |                      |                     |                      |                      |                     |
| DNA          | -6.41                | -0.43               | -1.63                | 10.75               | 13.15                | -13.15               | -10.74              | 1.63                 | 0.44                 | 6.42                |
| PA/DNA       | -10.59               | -7.08               | 6.15                 | -2.23               | 0.37                 | 1.17                 | 2.39                | -2.93                | 16.58                | 23.00               |
| Propeller, ° |                      |                     |                      |                     |                      |                      |                     |                      |                      |                     |
| DNA          | -15.16               | -11.87              | -3.23                | -5.12               | -10.90               | -10.90               | -5.15               | -3.23                | -11.87               | -15.15              |
| PA/DNA       | -16.87               | -6.31               | -10.92               | -4.05               | -14.69               | -16.26               | -4.66               | -7.96                | -5.00                | -17.05              |
| Opening, °   |                      |                     |                      |                     |                      |                      |                     |                      |                      |                     |
| DNA          | 0.99                 | -1.15               | 1.35                 | 1.26                | -0.27                | -0.27                | 1.27                | 1.34                 | -1.13                | 1.00                |
| PA/DNA       | 0.68                 | 1.71                | 3.84                 | -0.78               | -4.87                | -4.88                | -1.10               | 3.78                 | 0.87                 | -0.15               |
| Sugar pucker |                      |                     |                      |                     |                      |                      |                     |                      |                      |                     |
| DNA          | O4'-endo<br>C1'-exo  | C2'-endo<br>C3'-exo | C2'-endo<br>C2'-endo | C1'-exo<br>O4'-endo | C2'-endo<br>C2'-endo | C2'-endo<br>C2'-endo | O4'-endo<br>C1'-exo | C2'-endo<br>C2'-endo | C3'-exo<br>C2'-endo  | C1'-exo<br>O4'-endo |
| PA/DNA       | C3'-endo<br>C2'-endo | C1'-exo<br>C2'-endo | C2'-endo<br>O4'-endo | C2'-endo<br>C1'-exo | O4'-endo<br>C1'-exo  | C1'-exo<br>O4'-endo  | C1'-exo<br>C2'-endo | O4'-endo<br>C2'-endo | C2'-endo<br>C2'-endo | C1'-exo<br>C3'-endo |

\*Relationship between the bases composing the base pair.

†DNA corresponds to 0.73 Å structure of duplex DNA solved by Rees and coworkers (PDB 1D8G, 5'-CCAGTACTGG-3').

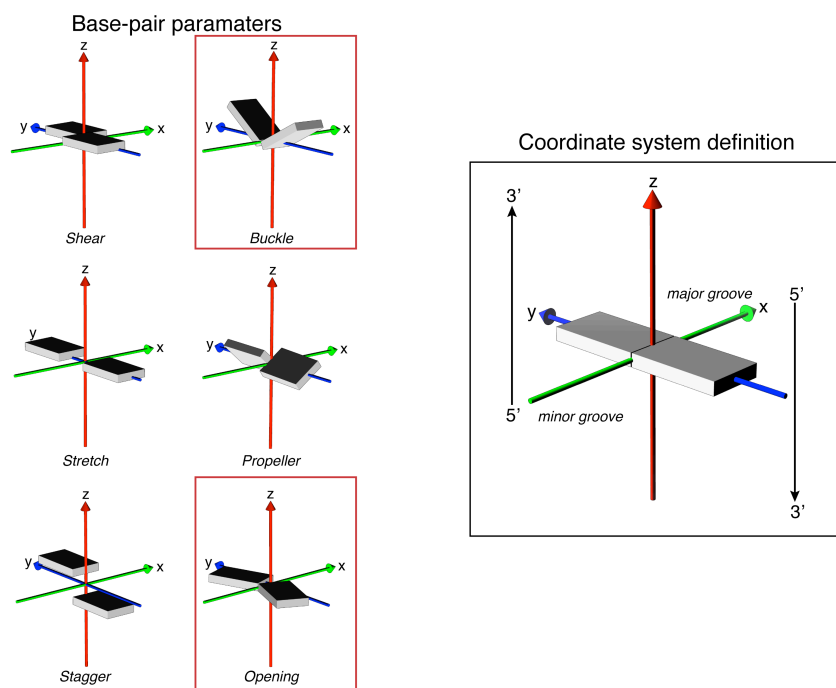

**Figure S4.** Local base-pair parameters and sugar pucker values for DNA in the absence and presence of polyamide.

**Local base-pair helical parameters**

| Parameter*        | CC/GG | CA/TG | AG/CT | GT/AC | TA/TA | AC/GT | CT/AG  | TG/CA | GG/CC |
|-------------------|-------|-------|-------|-------|-------|-------|--------|-------|-------|
| X-displacement, Å |       |       |       |       |       |       |        |       |       |
| DNA               | -0.42 | 3.84  | -1.31 | 0.57  | -0.41 | 0.57  | -1.32  | 3.84  | -0.42 |
| PA/DNA            | -1.36 | -0.07 | -1.21 | -0.76 | 0.42  | -0.81 | -1.07  | 0.59  | -0.34 |
| Y-displacement, Å |       |       |       |       |       |       |        |       |       |
| DNA               | 1.83  | -0.36 | -2.71 | 1.50  | 0.00  | -1.50 | 2.71   | 0.36  | -1.84 |
| PA/DNA            | 0.98  | -0.68 | 1.45  | 1.36  | 0.05  | -1.34 | -1.59  | 1.60  | -1.52 |
| Inclination, °    |       |       |       |       |       |       |        |       |       |
| DNA               | 17.85 | -9.25 | 25.08 | -1.20 | 3.96  | -1.20 | 25.12  | -9.26 | 17.85 |
| PA/DNA            | 12.96 | 16.43 | 17.68 | 5.14  | 11.58 | 4.47  | 16.74  | 18.10 | 6.29  |
| Tip, °            |       |       |       |       |       |       |        |       |       |
| DNA               | -6.56 | 1.59  | 9.92  | -3.62 | 0.00  | 3.60  | -9.90  | -1.59 | 6.59  |
| PA/DNA            | -9.78 | -1.38 | 13.33 | -0.33 | 0.26  | -0.73 | -12.56 | -1.20 | 9.97  |

\*Relationship between the bases composing the base pair.

†DNA corresponds to 0.73 Å structure of duplex DNA solved by Rees and coworkers (PDB 1D8G, 5'-CCAGTACTGG-3').

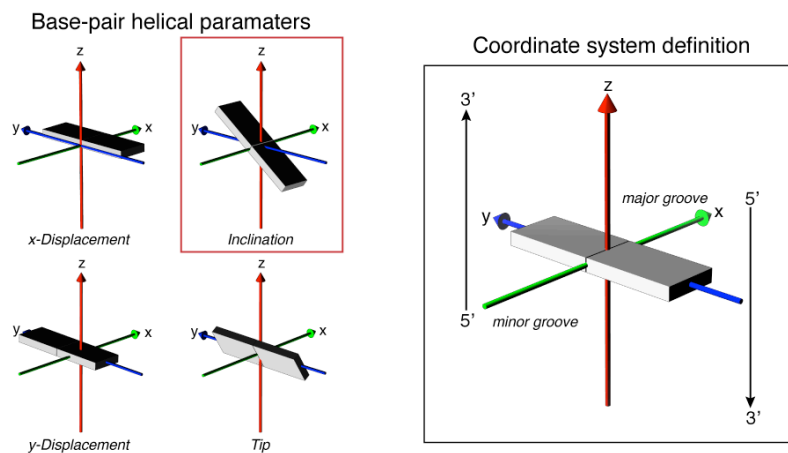

**Figure S5.** Local base-pair helical parameters for DNA in the absence and presence of polyamide.

**Table S1.** DNA sequence alignment for GR crystal structures from the literature.

| DNA Sequence Alignment for GR Structures |          |          |          |          |          |          |          |          |          |          |          |          |          |          |          |          |          |          |
|------------------------------------------|----------|----------|----------|----------|----------|----------|----------|----------|----------|----------|----------|----------|----------|----------|----------|----------|----------|----------|
| Gene                                     |          |          |          | FkBp     | FkBp     | FkBp     | FkBp     | FkBp     | GilZ     | GilZ     | GilZ     | Pal      | Pal      | Pal      | Sgk      | Sgk      | Sgk      | Cgt      |
| PDB #                                    | 1R4R     | 1R4O     | 1GLU     | 3G6P     | 3G6T     | 3G6R     | 3G6Q_1   | 3G6U     | 3G8X     | 3G8U     | 3G97     | 3G9J     | 3G99     | 3G9I     | 3G9P     | 3G9O     | 3G9M     | 3FYL     |
| 0                                        |          |          |          |          |          |          |          |          |          |          |          |          |          |          |          |          |          |          |
| 1                                        |          |          |          |          |          |          |          |          |          |          |          |          |          |          |          |          |          |          |
| 2                                        | <b>A</b> | <b>A</b> | <b>A</b> | <b>A</b> |          | <b>A</b> |          |          |          |          |          |          |          |          |          |          |          |          |
| 3                                        | <b>G</b> |
| 4                                        | <b>A</b> |
| 5                                        | <b>A</b> |
| 6                                        | <b>C</b> |
| 7                                        | A        | A        | A        | A        | A        | A        | A        | A        | C        | C        | C        | A        | A        | A        | A        | A        | A        | A        |
| 8                                        | T        | T        | T        | C        | C        | G        | G        | G        | C        | C        | C        | A        | A        | A        | T        | T        | T        | T        |
| 9                                        | G        | C        | C        | C        | C        | G        | G        | G        | A        | A        | A        | A        | A        | A        | T        | T        | T        | T        |
| 10                                       | A        | G        | G        | C        | C        | G        | G        | G        | A        | A        | A        | A        | A        | A        | T        | T        | T        | T        |
| 11                                       | T        | A        | A        | T        | T        | T        | T        | T        | T        | T        | T        | T        | T        | T        | T        | T        | T        | T        |
| 12                                       | G        | T        | T        | G        | G        | G        | G        | G        | G        | G        | G        | G        | G        | G        | G        | G        | G        | G        |
| 13                                       | T        | G        | G        | T        | T        | T        | T        | T        | T        | T        | T        | T        | T        | T        | T        | T        | T        | T        |
| 14                                       | T        | T        | T        | T        | T        | T        | T        | T        | T        | T        | T        | T        | T        | T        | T        | T        | T        | T        |
| 15                                       | C        | T        | T        | C        | C        | C        | C        | C        | C        | C        | C        | C        | C        | C        | C        | C        | C        | C        |
| 16                                       | T        | C        | C        | T        |          | T        |          |          |          |          |          | T        |          |          |          |          |          |          |
| 17                                       | C        | T        | T        |          |          |          |          |          |          |          |          |          |          |          |          |          |          |          |
